# Supplementary material for: Sustained AAV9-mediated expression of a non-self protein in the CNS of non-human primates after immunomodulation
Source: PubMed Central journal article supplement (PMC5991358; doi:10.1371/journal.pone.0198154), 2018-06-06

# S5 Figure

GFP only

GFP + rapamycin

10279

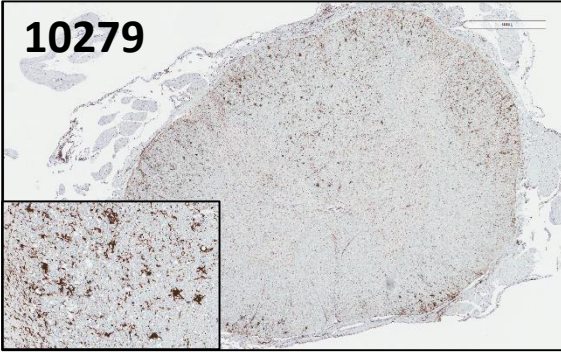

11286

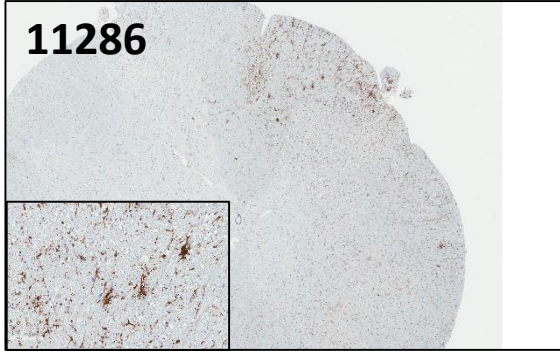

11290

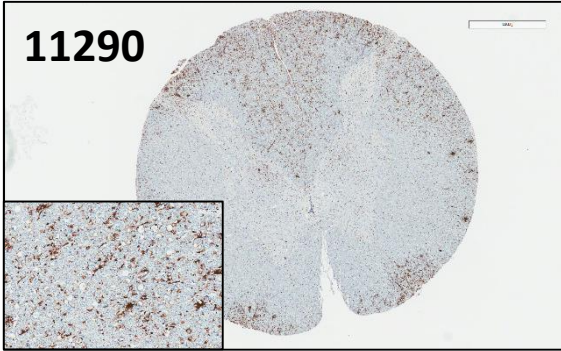

11023

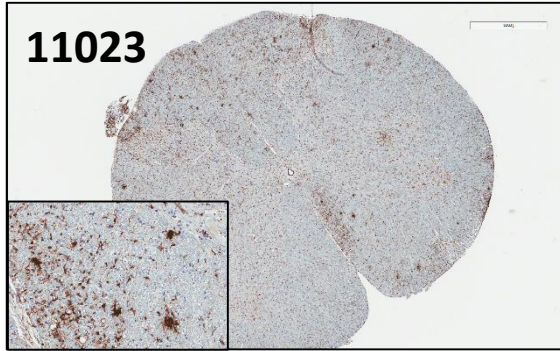

11292

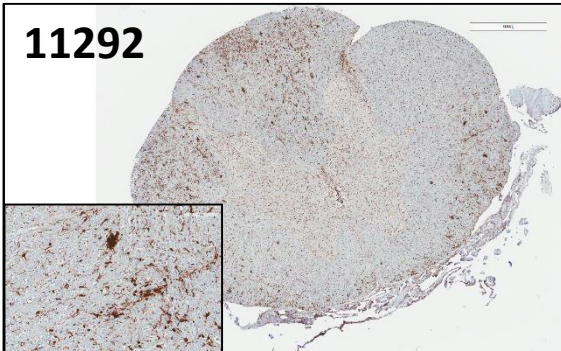

11291

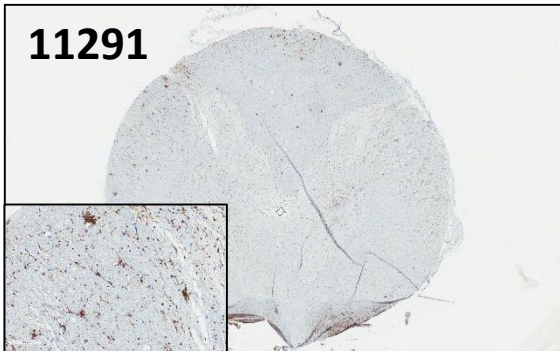

10277

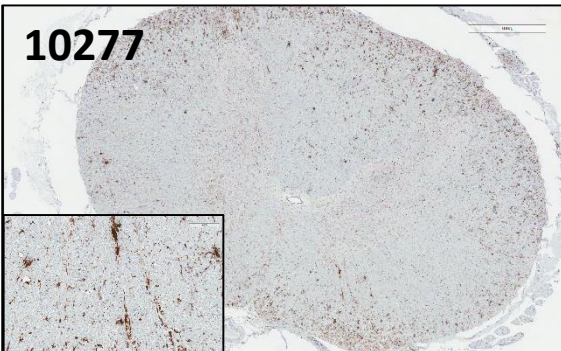

11287

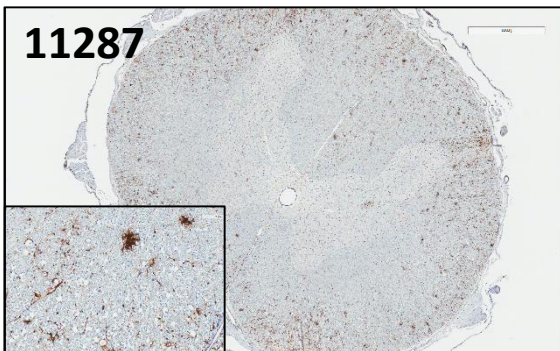

Control  
animal

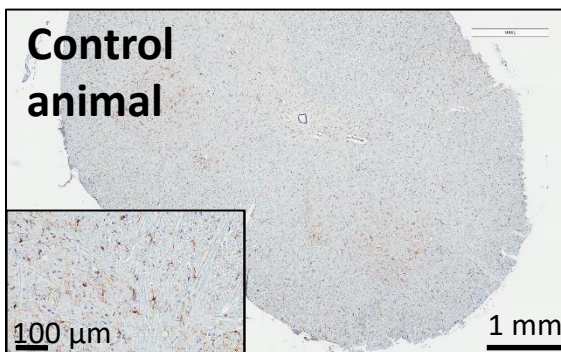

Supplement: pone.0198154.s005.pdf [file pone.0198154.s005.pdf]
